# Supplementary material for: Evidence for light-induced oxygen exchange in the oxidation of liquid hydrocarbons on oxygen 18-labelled titanium dioxide
Source: Royal Society of Chemistry journal article supplement (doi:10.1039/c3ra40460a), 2013-01-01
Supplement: c3ra40460a.pdf [file c3ra40460a.pdf]

## **Electronic Supplementary Information**

### **Evidence for light-induced oxygen exchange in the oxidation of liquid hydrocarbons on oxygen 18-labelled titanium dioxide**

*Jongmyung Choi,<sup>a</sup> Donghyeon Kang,<sup>a</sup> Kyu Hyung Lee,<sup>a</sup> Byeongno Lee,<sup>a</sup> Kyung Joong Kim<sup>b</sup>  
and Nam Hwi Hur<sup>\*a</sup>*

<sup>a</sup> Department of Chemistry, Sogang University, Seoul 121-742, Korea.

<sup>b</sup> Division of Industrial Metrology, Korea Research Institute of Standards and Science,  
Daejeon 305-600, Korea.

<sup>\*</sup>E-mail: nhhur@sogang.ac.kr

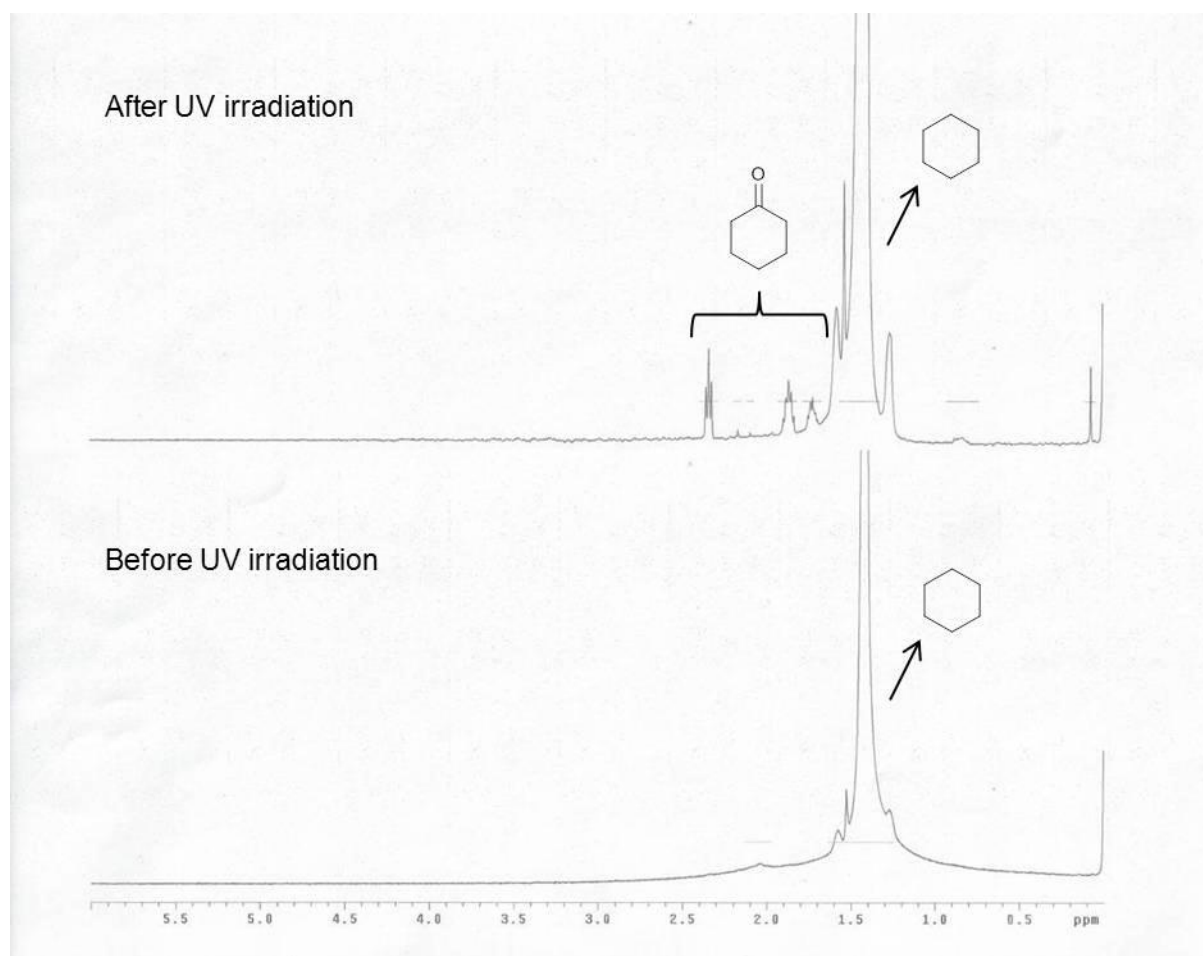

**Fig. S1**  $^1\text{H}$  NMR spectra before and after UV irradiation of cyclohexane using  $^{18}\text{O}$ -labelled  $\text{TiO}_2$  as a catalyst.

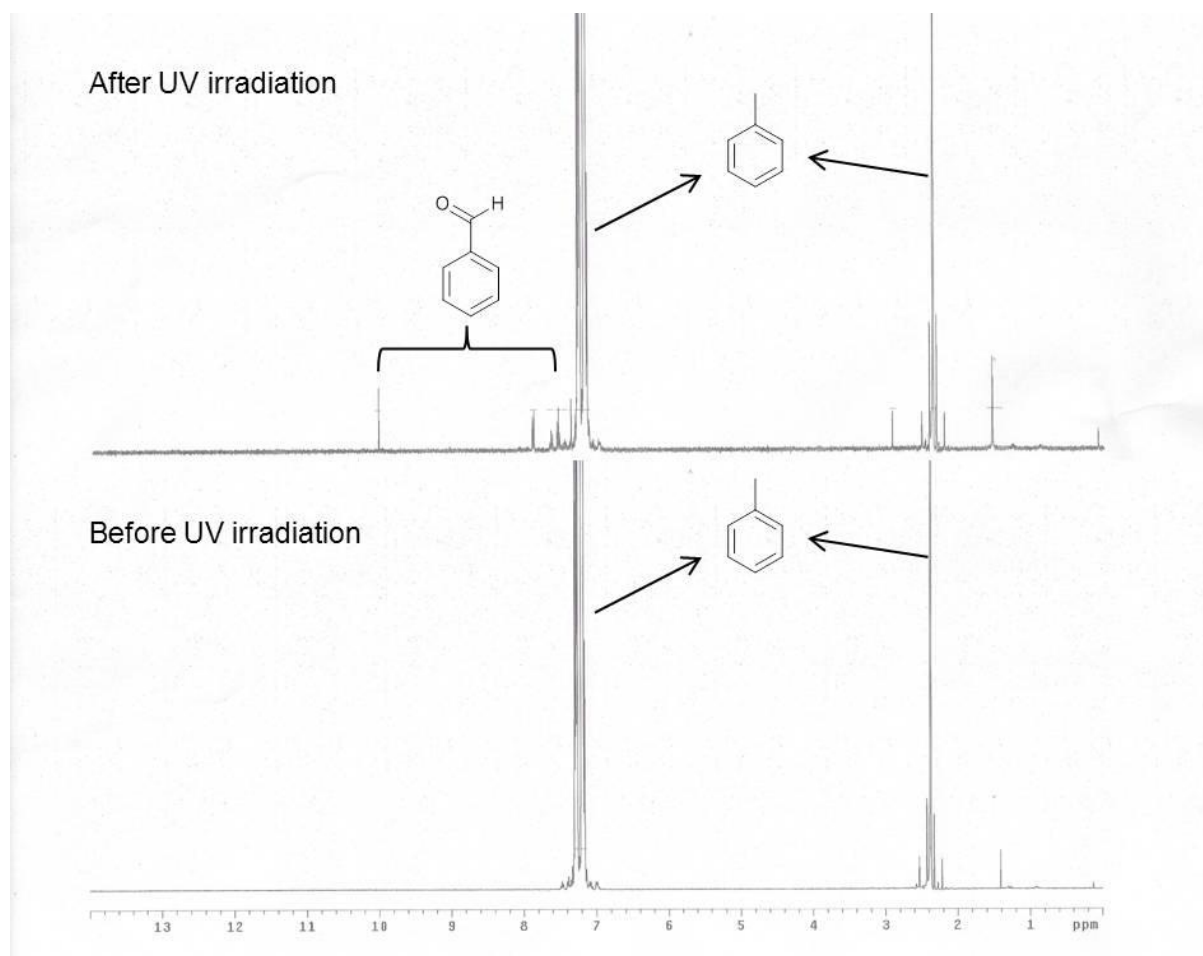

**Fig. S2**  $^1\text{H}$  NMR spectra before and after UV irradiation of toluene using  $^{18}\text{O}$ -labelled  $\text{TiO}_2$  as a catalyst.

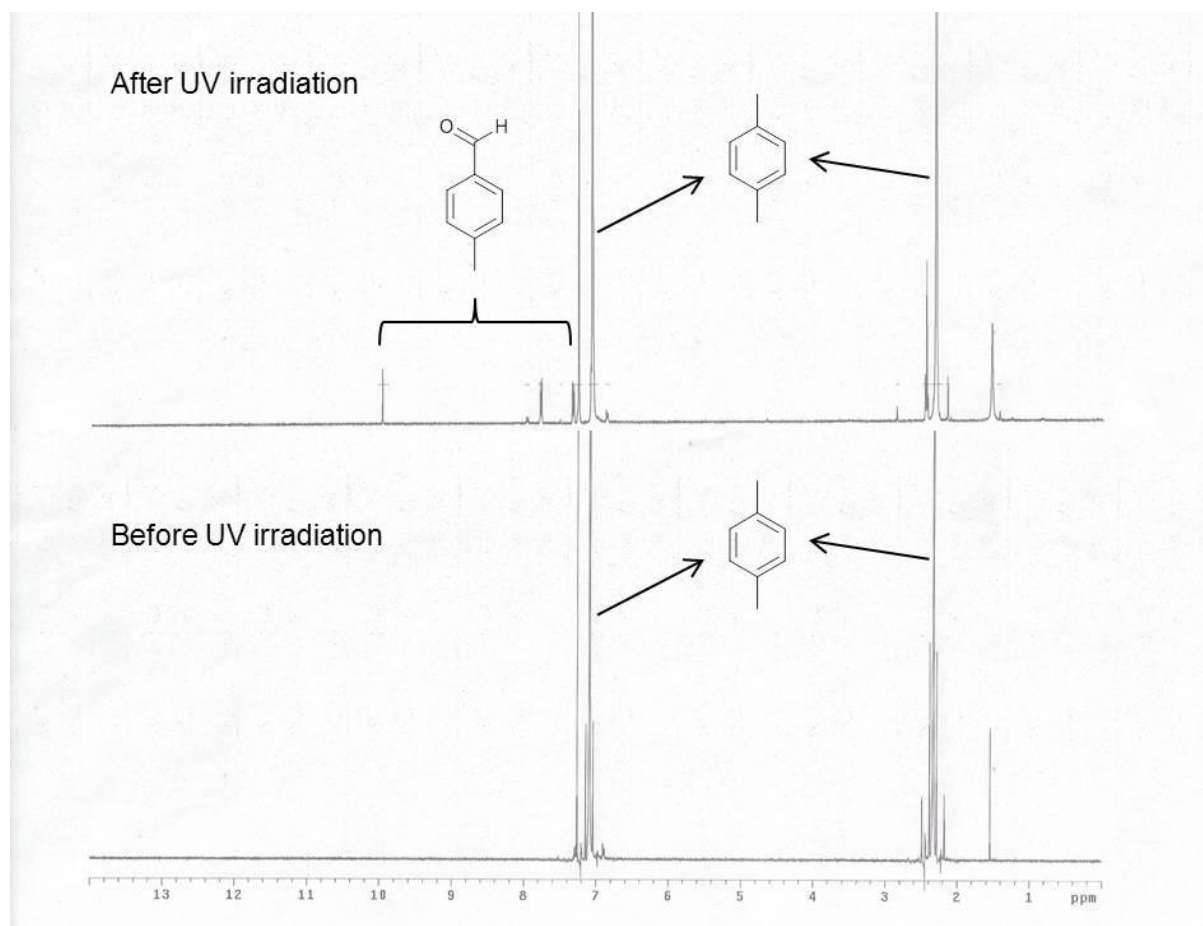

**Fig. S3**  $^1\text{H}$  NMR spectra before and after UV irradiation of p-xylene using  $^{18}\text{O}$ -labelled  $\text{TiO}_2$  as a catalyst.

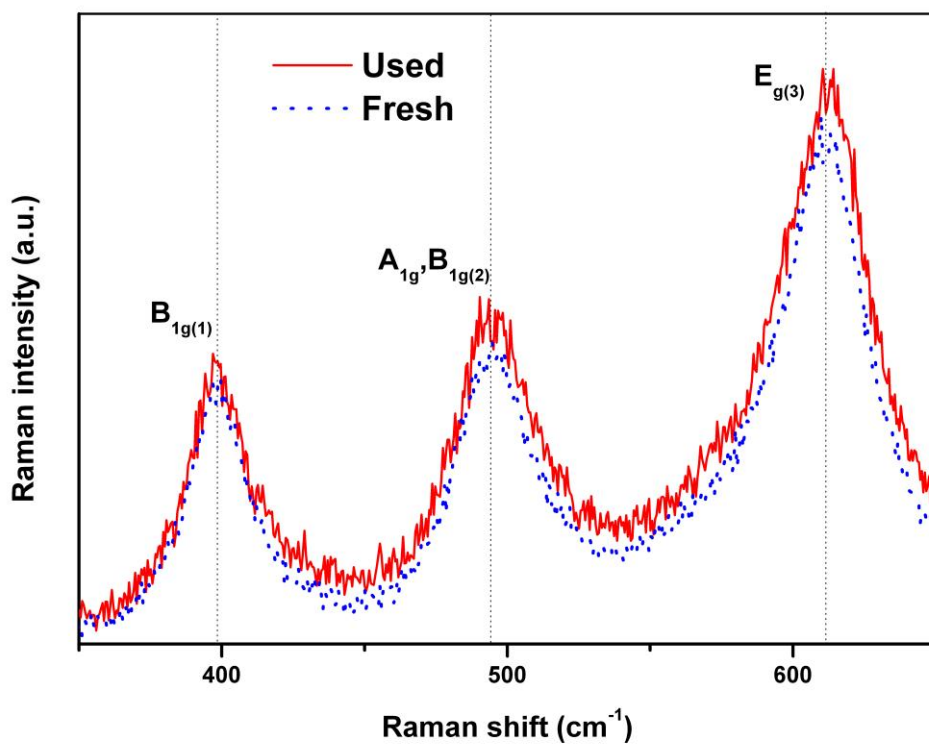

**Fig. S4** Raman spectra of fresh <sup>18</sup>O-labelled TiO<sub>2</sub> (dashed blue curve) and used <sup>18</sup>O-labelled TiO<sub>2</sub> (red curve).
